# Supplementary material
Source: Springer Nature journal article supplement (https://www.springermedizin.de/resource/supplementary/12878_2012_62_MOESM1_ESM.pdf/9441628)

X Density  
in A

X Density  
in B

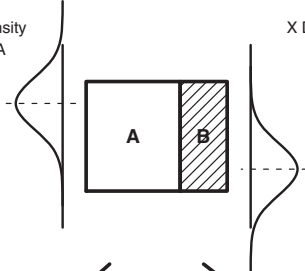

PS

MMS

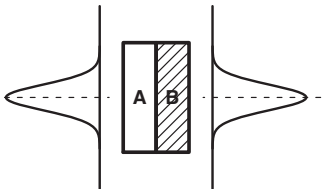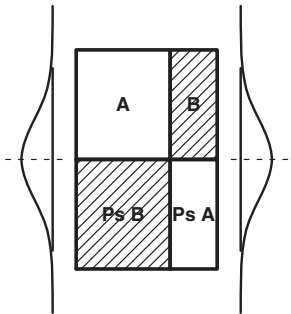

Supplement: MOESM1 [file 9441628]
